# Supplementary material for: Associations between epigenetic age acceleration and infertility
Source: PubMed Central journal article supplement — Hum Reprod. 2022 Jun 30;37(9):2063–74. doi: 10.1093/humrep/deac147 (PMC9433848; doi:10.1093/humrep/deac147), 2022-06-30
Supplement: deac147_supplementary_figure_s1.pdf [file deac147_supplementary_figure_s1.pdf]

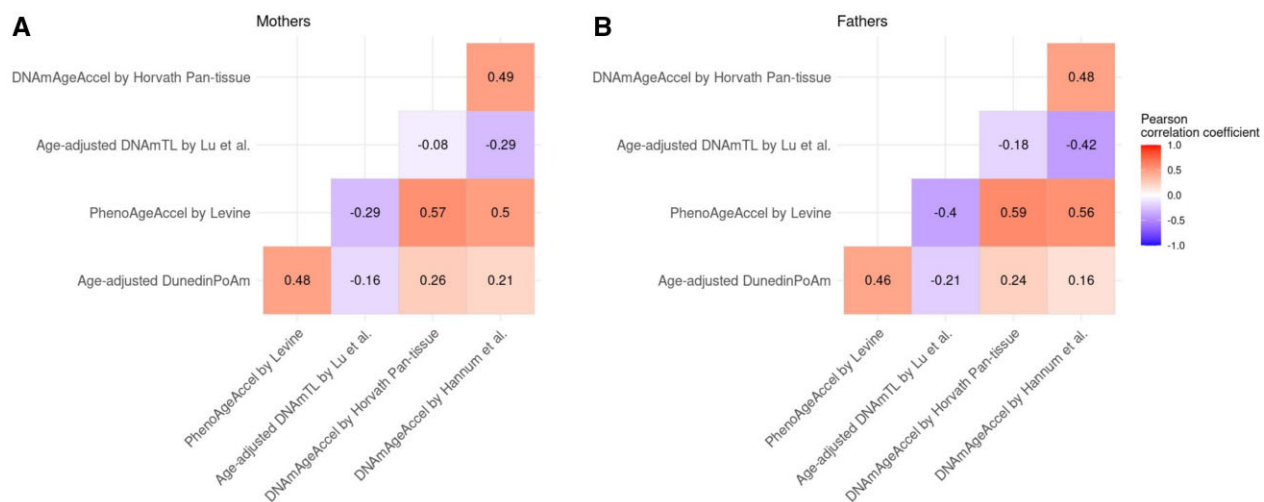

**Supplementary Figure S1. Correlations across chronological age-adjusted biomarker of aging.** The numbers in the heatmap refer to Pearson correlation coefficients.
