# Supplementary material for: Associations between epigenetic age acceleration and infertility
Source: PubMed Central journal article supplement — Hum Reprod. 2022 Jun 30;37(9):2063–74. doi: 10.1093/humrep/deac147 (PMC9433848; doi:10.1093/humrep/deac147), 2022-06-30
Supplement: deac147_supplementary_figure_s3.pdf [file deac147_supplementary_figure_s3.pdf]

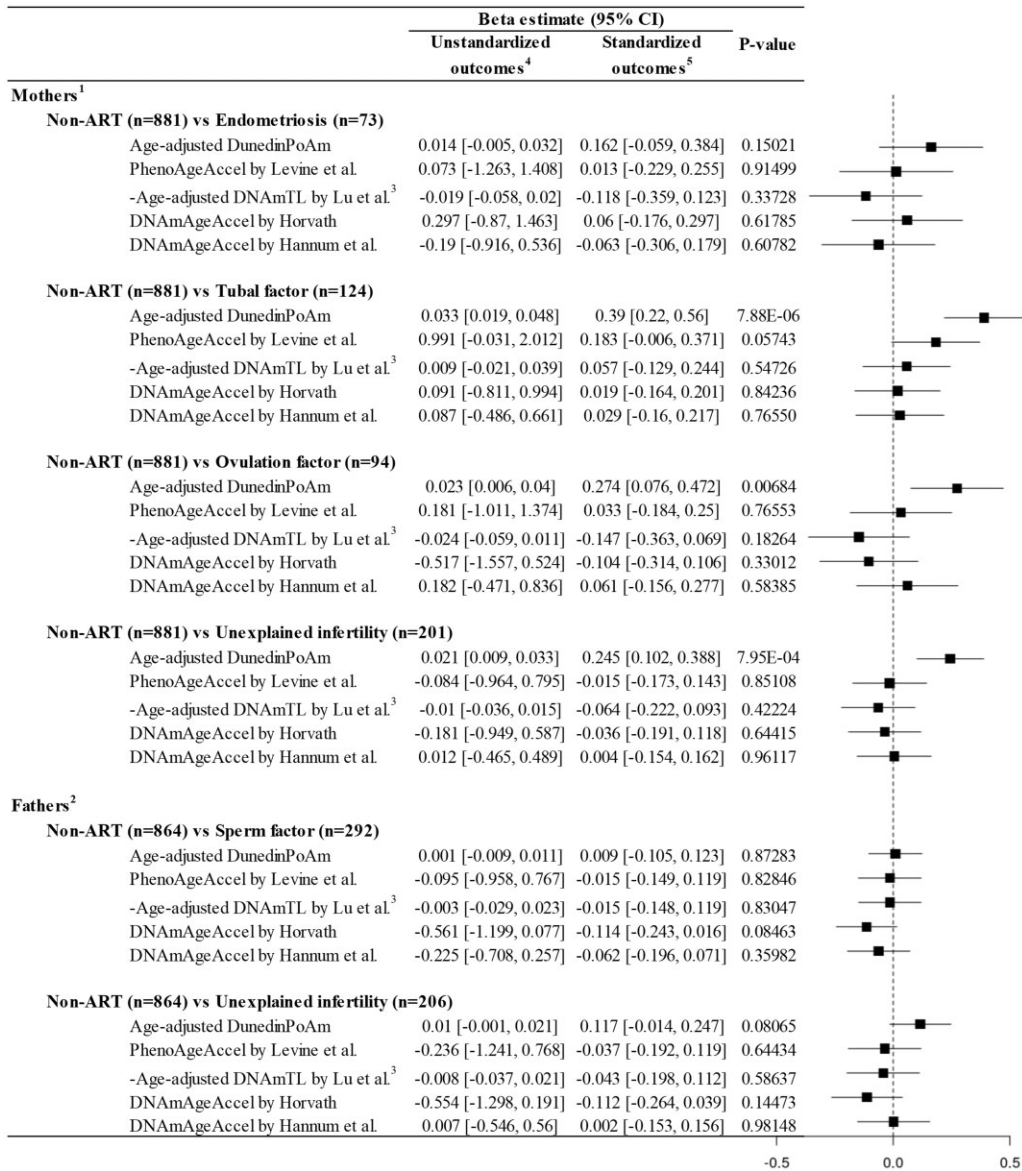

**Supplementary Figure S3. Association between epigenetic age accelerations and main causes of infertility.** <sup>1</sup>In mothers, the associations were adjusted for smoking (pre-pregnancy), alcohol intake (pre-pregnancy), BMI (pre-pregnancy), education, parity and plate. <sup>2</sup>In fathers, the associations were adjusted for smoking, alcohol intake, BMI, education, partner's parity and plate. <sup>3</sup>Age-adjusted DNAmTL by Lu et al. was multiplied by  $-1$ . DNAmTL declines with advanced chronological age. <sup>4</sup>The epigenetic age accelerations as outcome variables were not standardized. <sup>5</sup>The epigenetic age accelerations as outcome variables were standardized.
