# Supplementary material for: Associations between epigenetic age acceleration and infertility
Source: PubMed Central journal article supplement — Hum Reprod. 2022 Jun 30;37(9):2063–74. doi: 10.1093/humrep/deac147 (PMC9433848; doi:10.1093/humrep/deac147), 2022-06-30
Supplement: deac147_supplementary_figure_s7.pdf [file deac147_supplementary_figure_s7.pdf]

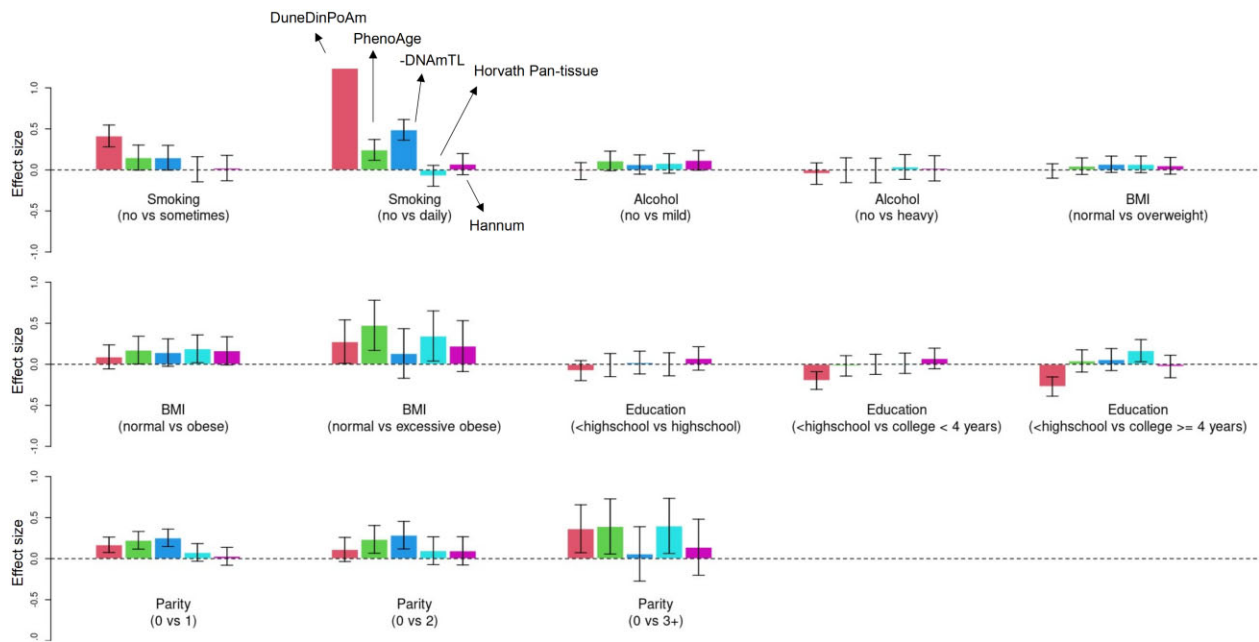

**Supplementary Figure S7. Associations between epigenetic age accelerations and covariates in fathers.** Each of the standardized epigenetic age accelerations was regressed on the covariates and the use of ART. This figure displays the adjusted effects of the covariates on epigenetic age accelerations.
