# Supplementary material for: Associations between epigenetic age acceleration and infertility
Source: PubMed Central journal article supplement — Hum Reprod. 2022 Jun 30;37(9):2063–74. doi: 10.1093/humrep/deac147 (PMC9433848; doi:10.1093/humrep/deac147), 2022-06-30
Supplement: deac147_supplementary_table_si.pdf [file deac147_supplementary_table_si.pdf]

human reproduction **SUPPLEMENTARY DATA**

**Supplementary Table SI** Information on the subsidiary and main causes of infertility among the ART parents.

|                                         |              |                  |              |                         | IVF<br>(n = 525) | ICSI<br>(n = 369) | Total<br>(n = 894) |
|-----------------------------------------|--------------|------------------|--------------|-------------------------|------------------|-------------------|--------------------|
| <b>Subsidiary causes of infertility</b> |              |                  |              |                         |                  |                   |                    |
| Endometriosis                           | Tubal factor | Ovulation factor | Sperm factor | Unexplained infertility |                  |                   |                    |
| ○                                       | ○            | ○                |              |                         | 1                | 0                 | 1                  |
| ○                                       | ○            |                  | ○            |                         | 3                | 5                 | 8                  |
| ○                                       | ○            |                  |              |                         | 20               | 2                 | 22                 |
| ○                                       |              | ○                | ○            |                         | 0                | 1                 | 1                  |
| ○                                       |              | ○                |              | ○                       | 1                | 0                 | 1                  |
| ○                                       |              | ○                |              |                         | 2                | 0                 | 2                  |
| ○                                       |              |                  | ○            | ○                       | 0                | 1                 | 1                  |
| ○                                       |              |                  | ○            |                         | 6                | 11                | 17                 |
| ○                                       |              |                  |              | ○                       | 5                | 1                 | 6                  |
| ○                                       |              |                  |              |                         | 56               | 6                 | 62                 |
|                                         | ○            | ○                | ○            |                         | 1                | 1                 | 2                  |
|                                         | ○            | ○                |              |                         | 9                | 0                 | 9                  |
|                                         | ○            |                  | ○            |                         | 6                | 12                | 18                 |
|                                         | ○            |                  |              | ○                       | 9                | 0                 | 9                  |
|                                         | ○            |                  |              |                         | 98               | 7                 | 105                |
|                                         |              | ○                | ○            | ○                       | 0                | 2                 | 2                  |
|                                         |              | ○                | ○            |                         | 14               | 38                | 52                 |
|                                         |              | ○                |              | ○                       | 5                | 0                 | 5                  |
|                                         |              | ○                |              |                         | 61               | 5                 | 66                 |
|                                         |              |                  | ○            | ○                       | 8                | 9                 | 17                 |
|                                         |              |                  | ○            |                         | 26               | 242               | 268                |
|                                         |              |                  |              | ○                       | 189              | 21                | 210                |
|                                         |              |                  |              |                         | 5 <sup>1</sup>   | 5 <sup>1</sup>    | 10 <sup>1</sup>    |
| <b>Main causes of infertility</b>       |              |                  |              |                         |                  |                   |                    |
| Endometriosis                           | Tubal factor | Ovulation factor | Sperm factor | Unexplained infertility |                  |                   |                    |
| ○                                       |              |                  |              |                         | 65               | 11                | 76                 |
|                                         | ○            |                  |              |                         | 126              | 13                | 139                |
|                                         |              | ○                |              |                         | 84               | 19                | 103                |
|                                         |              |                  | ○            |                         | 32               | 283               | 315                |
|                                         |              |                  |              | ○                       | 198              | 27                | 225                |
|                                         |              |                  |              |                         | 20 <sup>1</sup>  | 16 <sup>1</sup>   | 36 <sup>1</sup>    |

<sup>1</sup>The number of couples with missing cause of infertility.
